# Supplementary material for: CLPX regulates mitochondrial fatty acid β-oxidation by modulating protein complex formation in liver cells
Source: Research Square preprint supplement (doi:10.21203/rs.3.rs-1388288/v1), 2022-04-26
Supplement: Supplementary file 1 [file 0cda465426309077bf96838b.xlsx]

## Sheet: Identified_protein_list
	# of Identified proteins	# of mitochondrial proteins	# of specific binding mitochondrial proteins			Specific binding proteins for CLPX
OTC-Lucf ind/FT293	568	58	8			Uniprot ID	Gene name	Protein name	Unique peptides	PSMs
CLPX ind/FT293DCLPX	675	78	27			P42765	ACAA2	3-ketoacyl-CoA thiolase, mitochondrial	7	10
						P24752	ACAT1	Acetyl-CoA acetyltransferase, mitochondrial	2	2
						Q99798	ACO2	Aconitate hydratase, mitochondrial	2	6
						O00154	ACOT7	Cytosolic acyl coenzyme A thioester hydrolase	1	6
						P54819	AK2	Adenylate kinase 2, mitochondrial	2	3
						Q8N5M1	ATPAF2	ATP synthase mitochondrial F1 complex assembly factor 2	3	7
						Q9Y6H1	CHCHD2	Coiled-coil-helix-coiled-coil-helix domain-containing protein 2	5	7
						Q5T1J5	CHCHD2P9	Putative coiled-coil-helix-coiled-coil-helix domain-containing protein CHCHD2P9, mitochondrial	4	5
						P12532	CKMT1A	Creatine kinase U-type, mitochondrial	5	5
						O75390	CS	Citrate synthase, mitochondrial	3	14
						P63167	DYNLL1	Dynein light chain 1, cytoplasmic	1	3
						P30084	ECHS1	Enoyl-CoA hydratase, mitochondrial	7	29
						P13804	ETFA	Electron transfer flavoprotein subunit alpha, mitochondrial	5	8
						P40939	HADHA	Trifunctional enzyme subunit alpha, mitochondrial	10	17
						P55084	HADHB	Trifunctional enzyme subunit beta, mitochondrial	2	2
						P50213	IDH3A	Isocitrate dehydrogenase [NAD] subunit alpha, mitochondrial	1	6
						Q92552	MRPS27	28S ribosomal protein S27, mitochondrial	2	2
						P52815	MRPL12	39S ribosomal protein L12, mitochondrial	2	7
						P00403	MT-CO2	Cytochrome c oxidase subunit 2	3	4
						Q96DU9	PABPC5	Polyadenylate-binding protein 5	1	5
						P11177	PDHB	Pyruvate dehydrogenase E1 component subunit beta, mitochondrial	2	2
						P36873	PPP1CC	Serine/threonine-protein phosphatase PP1-gamma catalytic subunit	4	6
						Q96C36	PYCR2	Pyrroline-5-carboxylate reductase 2	25	30
						Q9H9B4	SFXN1	Sideroflexin-1	1	4
						P00441	SOD1	Superoxide dismutase [Cu-Zn]	3	4
						Q9UJZ1	STOML2	Stomatin-like protein 2, mitochondrial	3	7
						Q16740	CLPP	ATP-dependent Clp protease proteolytic subunit, mitochondrial	52	56
						O76031	CLPX	ATP-dependent Clp protease ATP-binding subunit clpX-like, mitochondrial	531	729

## Sheet: Extracted_GO_CLPX
GO annotation in CLPX binding proteins
Category	Term
Cluster 1	Enrichment Score: 7.48	Count	FDR
KEGG_PATHWAY	hsa01130:Biosynthesis of antibiotics	11	2.20638e-08
KEGG_PATHWAY	hsa01200:Carbon metabolism	7	0.000271495
KEGG_PATHWAY	hsa01100:Metabolic pathways	13	0.00589378
Category	Term
Cluster 2	Enrichment Score: 4.05	Count	FDR
KEGG_PATHWAY	hsa01130:Biosynthesis of antibiotics	11	2.20638e-08
KEGG_PATHWAY	hsa00062:Fatty acid elongation	5	0.000400688
GOTERM_BP_DIRECT	GO:0006635~fatty acid beta-oxidation	5	0.0007218
KEGG_PATHWAY	hsa00071:Fatty acid degradation	5	0.00344826
KEGG_PATHWAY	hsa00280:Valine, leucine and isoleucine degradation	5	0.00545019
KEGG_PATHWAY	hsa01212:Fatty acid metabolism	5	0.00593594
GOTERM_MF_DIRECT	GO:0003988~acetyl-CoA C-acyltransferase activity	3	0.0157966
INTERPRO	IPR020610:Thiolase, active site	3	0.0204759
INTERPRO	IPR020615:Thiolase, acyl-enzyme intermediate active site	3	0.0204759
INTERPRO	IPR002155:Thiolase	3	0.0306859
INTERPRO	IPR020613:Thiolase, conserved site	3	0.0306859
INTERPRO	IPR020616:Thiolase, N-terminal	3	0.0306859
INTERPRO	IPR020617:Thiolase, C-terminal	3	0.0306859
GOTERM_MF_DIRECT	GO:0004300~enoyl-CoA hydratase activity	3	0.0394094
UP_SEQ_FEATURE	active site:Acyl-thioester intermediate	3	0.0469618
Category	Term
Cluster 3	Enrichment Score: 3.93	Count	FDR
KEGG_PATHWAY	hsa01200:Carbon metabolism	7	0.000271495
UP_KEYWORDS	Tricarboxylic acid cycle	4	0.00443239
GOTERM_BP_DIRECT	GO:0006099~tricarboxylic acid cycle	4	0.014399

## Sheet: DAVID_GO_CLPX
Annotation Cluster 1	Enrichment Score: 7.483434674787442
Category	Term	Count	%	PValue	Genes	List Total	Pop Hits	Pop Total	Fold Enrichment	Bonferroni	Benjamini	FDR
KEGG_PATHWAY	hsa01130:Biosynthesis of antibiotics	11	39.2857	2.20951e-11	ECHA_HUMAN, KAD2_HUMAN, ACON_HUMAN, THIM_HUMAN, CISY_HUMAN, ECHM_HUMAN, ODPB_HUMAN, ECHB_HUMAN, THIL_HUMAN, IDH3A_HUMAN, P5CR2_HUMAN	19	212	6879	18.7857	1.30361e-09	1.30361e-09	2.20638e-08
KEGG_PATHWAY	hsa01200:Carbon metabolism	7	25	2.71881e-07	ECHA_HUMAN, ACON_HUMAN, CISY_HUMAN, ECHM_HUMAN, ODPB_HUMAN, THIL_HUMAN, IDH3A_HUMAN	19	113	6879	22.428	1.60409e-05	8.02046e-06	0.000271495
KEGG_PATHWAY	hsa01100:Metabolic pathways	13	46.4286	5.9023e-06	KAD2_HUMAN, ECHA_HUMAN, COX2_HUMAN, THIM_HUMAN, CISY_HUMAN, ECHM_HUMAN, ODPB_HUMAN, ECHB_HUMAN, THIL_HUMAN, IDH3A_HUMAN, ACON_HUMAN, KCRU_HUMAN, P5CR2_HUMAN	19	1219	6879	3.8611	0.000348176	5.80378e-05	0.00589378
Annotation Cluster 2	Enrichment Score: 4.052056406343781
Category	Term	Count	%	PValue	Genes	List Total	Pop Hits	Pop Total	Fold Enrichment	Bonferroni	Benjamini	FDR
KEGG_PATHWAY	hsa01130:Biosynthesis of antibiotics	11	39.2857	2.20951e-11	ECHA_HUMAN, KAD2_HUMAN, ACON_HUMAN, THIM_HUMAN, CISY_HUMAN, ECHM_HUMAN, ODPB_HUMAN, ECHB_HUMAN, THIL_HUMAN, IDH3A_HUMAN, P5CR2_HUMAN	19	212	6879	18.7857	1.30361e-09	1.30361e-09	2.20638e-08
KEGG_PATHWAY	hsa00062:Fatty acid elongation	5	17.8571	4.01258e-07	ECHA_HUMAN, THIM_HUMAN, ECHM_HUMAN, ECHB_HUMAN, BACH_HUMAN	19	25	6879	72.4105	2.36739e-05	7.89137e-06	0.000400688
GOTERM_BP_DIRECT	GO:0006635~fatty acid beta-oxidation	5	17.8571	5.87648e-07	ECHA_HUMAN, THIM_HUMAN, ECHM_HUMAN, ECHB_HUMAN, THIL_HUMAN	27	44	16792	70.6734	0.000104008	0.000104008	0.0007218
KEGG_PATHWAY	hsa00071:Fatty acid degradation	5	17.8571	3.45321e-06	ECHA_HUMAN, THIM_HUMAN, ECHM_HUMAN, ECHB_HUMAN, THIL_HUMAN	19	42	6879	43.1015	0.000203719	5.09337e-05	0.00344826
KEGG_PATHWAY	hsa00280:Valine, leucine and isoleucine degradation	5	17.8571	5.45806e-06	ECHA_HUMAN, THIM_HUMAN, ECHM_HUMAN, ECHB_HUMAN, THIL_HUMAN	19	47	6879	38.5162	0.000321975	6.44033e-05	0.00545019
KEGG_PATHWAY	hsa01212:Fatty acid metabolism	5	17.8571	5.94453e-06	ECHA_HUMAN, THIM_HUMAN, ECHM_HUMAN, ECHB_HUMAN, THIL_HUMAN	19	48	6879	37.7138	0.000350667	5.01028e-05	0.00593594
GOTERM_MF_DIRECT	GO:0003988~acetyl-CoA C-acyltransferase activity	3	10.7143	1.47523e-05	ECHA_HUMAN, THIM_HUMAN, ECHB_HUMAN	28	4	16881	452.17	0.0012237	0.0012237	0.0157966
INTERPRO	IPR020610:Thiolase, active site	3	10.7143	1.88237e-05	THIM_HUMAN, ECHB_HUMAN, THIL_HUMAN	27	5	18559	412.422	0.00169271	0.00169271	0.0204759
INTERPRO	IPR020615:Thiolase, acyl-enzyme intermediate active site	3	10.7143	1.88237e-05	THIM_HUMAN, ECHB_HUMAN, THIL_HUMAN	27	5	18559	412.422	0.00169271	0.00169271	0.0204759
INTERPRO	IPR002155:Thiolase	3	10.7143	2.82111e-05	THIM_HUMAN, ECHB_HUMAN, THIL_HUMAN	27	6	18559	343.685	0.00253582	0.00126871	0.0306859
INTERPRO	IPR020613:Thiolase, conserved site	3	10.7143	2.82111e-05	THIM_HUMAN, ECHB_HUMAN, THIL_HUMAN	27	6	18559	343.685	0.00253582	0.00126871	0.0306859
INTERPRO	IPR020616:Thiolase, N-terminal	3	10.7143	2.82111e-05	THIM_HUMAN, ECHB_HUMAN, THIL_HUMAN	27	6	18559	343.685	0.00253582	0.00126871	0.0306859
INTERPRO	IPR020617:Thiolase, C-terminal	3	10.7143	2.82111e-05	THIM_HUMAN, ECHB_HUMAN, THIL_HUMAN	27	6	18559	343.685	0.00253582	0.00126871	0.0306859
GOTERM_MF_DIRECT	GO:0004300~enoyl-CoA hydratase activity	3	10.7143	3.6808e-05	ECHA_HUMAN, ECHM_HUMAN, ECHB_HUMAN	28	6	16881	301.446	0.00305046	0.00152639	0.0394094
UP_SEQ_FEATURE	active site:Acyl-thioester intermediate	3	10.7143	4.5001e-05	THIM_HUMAN, ECHB_HUMAN, THIL_HUMAN	27	8	20063	278.653	0.00327976	0.00164123	0.0469618
GOTERM_MF_DIRECT	GO:0016747~transferase activity, transferring acyl groups other than amino-acyl groups	3	10.7143	8.80778e-05	THIM_HUMAN, ECHB_HUMAN, THIL_HUMAN	28	9	16881	200.964	0.00728412	0.00243396	0.0942792
INTERPRO	IPR016039:Thiolase-like	3	10.7143	0.000102996	THIM_HUMAN, ECHB_HUMAN, THIL_HUMAN	27	11	18559	187.465	0.00922727	0.00308527	0.11199
UP_KEYWORDS	Fatty acid metabolism	4	14.2857	0.000561754	ECHA_HUMAN, THIM_HUMAN, ECHM_HUMAN, ECHB_HUMAN	28	124	20581	23.7108	0.0541102	0.00922869	0.620571
GOTERM_BP_DIRECT	GO:0008152~metabolic process	4	14.2857	0.00215948	ACON_HUMAN, THIM_HUMAN, ECHB_HUMAN, THIL_HUMAN	27	168	16792	14.8078	0.317942	0.119748	2.62039
KEGG_PATHWAY	hsa00650:Butanoate metabolism	3	10.7143	0.00218376	ECHA_HUMAN, ECHM_HUMAN, THIL_HUMAN	19	27	6879	40.2281	0.121011	0.0116572	2.15939
KEGG_PATHWAY	hsa00640:Propanoate metabolism	3	10.7143	0.0023481	ECHA_HUMAN, ECHM_HUMAN, THIL_HUMAN	19	28	6879	38.7914	0.129512	0.0114919	2.32019
KEGG_PATHWAY	hsa00380:Tryptophan metabolism	3	10.7143	0.00475612	ECHA_HUMAN, ECHM_HUMAN, THIL_HUMAN	19	40	6879	27.1539	0.245183	0.0214045	4.64916
KEGG_PATHWAY	hsa00310:Lysine degradation	3	10.7143	0.00793675	ECHA_HUMAN, ECHM_HUMAN, THIL_HUMAN	19	52	6879	20.8877	0.375083	0.0330236	7.64877
UP_KEYWORDS	Lipid metabolism	4	14.2857	0.0186038	ECHA_HUMAN, THIM_HUMAN, ECHM_HUMAN, ECHB_HUMAN	28	433	20581	6.79017	0.84419	0.1555	18.7825
UP_KEYWORDS	Acyltransferase	3	10.7143	0.0210236	THIM_HUMAN, ECHB_HUMAN, THIL_HUMAN	28	171	20581	12.8954	0.877975	0.16079	20.9737
UP_KEYWORDS	Transferase	6	21.4286	0.0682369	KAD2_HUMAN, THIM_HUMAN, KCRU_HUMAN, CISY_HUMAN, ECHB_HUMAN, THIL_HUMAN	28	1708	20581	2.58209	0.999085	0.416219	54.2958
UP_SEQ_FEATURE	active site:Proton acceptor	3	10.7143	0.215984	THIM_HUMAN, ECHB_HUMAN, THIL_HUMAN	27	672	20063	3.31729	1	0.988212	92.112
Annotation Cluster 3	Enrichment Score: 3.9327248639732066
Category	Term	Count	%	PValue	Genes	List Total	Pop Hits	Pop Total	Fold Enrichment	Bonferroni	Benjamini	FDR
KEGG_PATHWAY	hsa01200:Carbon metabolism	7	25	2.71881e-07	ECHA_HUMAN, ACON_HUMAN, CISY_HUMAN, ECHM_HUMAN, ODPB_HUMAN, THIL_HUMAN, IDH3A_HUMAN	19	113	6879	22.428	1.60409e-05	8.02046e-06	0.000271495
UP_KEYWORDS	Tricarboxylic acid cycle	4	14.2857	4.00103e-06	ACON_HUMAN, CISY_HUMAN, ODPB_HUMAN, IDH3A_HUMAN	28	24	20581	122.506	0.000396024	9.90208e-05	0.00443239
GOTERM_BP_DIRECT	GO:0006099~tricarboxylic acid cycle	4	14.2857	1.17235e-05	ACON_HUMAN, CISY_HUMAN, ODPB_HUMAN, IDH3A_HUMAN	27	29	16792	85.7829	0.00207293	0.001037	0.014399
KEGG_PATHWAY	hsa00020:Citrate cycle (TCA cycle)	4	14.2857	5.84492e-05	ACON_HUMAN, CISY_HUMAN, ODPB_HUMAN, IDH3A_HUMAN	19	30	6879	48.2737	0.00344266	0.000430982	0.058351
KEGG_PATHWAY	hsa01230:Biosynthesis of amino acids	4	14.2857	0.000801521	ACON_HUMAN, CISY_HUMAN, IDH3A_HUMAN, P5CR2_HUMAN	19	72	6879	20.114	0.0462071	0.00524273	0.797508
KEGG_PATHWAY	hsa01210:2-Oxocarboxylic acid metabolism	3	10.7143	0.000859344	ACON_HUMAN, CISY_HUMAN, IDH3A_HUMAN	19	17	6879	63.8916	0.0494581	0.00505946	0.85482
GOTERM_CC_DIRECT	GO:0005634~nucleus	9	32.1429	0.576045	CHCH9_HUMAN, ACON_HUMAN, PP1G_HUMAN, CISY_HUMAN, ODPB_HUMAN, DYL1_HUMAN, SODC_HUMAN, CHCH2_HUMAN, IDH3A_HUMAN	28	5415	18224	1.08176	1	0.998838	99.9832
Annotation Cluster 4	Enrichment Score: 0.558874351996013
Category	Term	Count	%	PValue	Genes	List Total	Pop Hits	Pop Total	Fold Enrichment	Bonferroni	Benjamini	FDR
UP_KEYWORDS	Transferase	6	21.4286	0.0682369	KAD2_HUMAN, THIM_HUMAN, KCRU_HUMAN, CISY_HUMAN, ECHB_HUMAN, THIL_HUMAN	28	1708	20581	2.58209	0.999085	0.416219	54.2958
UP_KEYWORDS	ATP-binding	4	14.2857	0.274199	KAD2_HUMAN, THIM_HUMAN, KCRU_HUMAN, CLPX_HUMAN	28	1391	20581	2.11369	1	0.879387	97.1286
INTERPRO	IPR027417:P-loop containing nucleoside triphosphate hydrolase	3	10.7143	0.35073	KAD2_HUMAN, THIM_HUMAN, CLPX_HUMAN	27	879	18559	2.34597	1	0.99994	99.0892
UP_SEQ_FEATURE	nucleotide phosphate-binding region:ATP	3	10.7143	0.371597	KAD2_HUMAN, KCRU_HUMAN, CLPX_HUMAN	27	994	20063	2.24268	1	0.998867	99.2165
UP_KEYWORDS	Nucleotide-binding	4	14.2857	0.42015	KAD2_HUMAN, THIM_HUMAN, KCRU_HUMAN, CLPX_HUMAN	28	1788	20581	1.64438	1	0.950084	99.7613
GOTERM_MF_DIRECT	GO:0005524~ATP binding	4	14.2857	0.432732	KAD2_HUMAN, THIM_HUMAN, KCRU_HUMAN, CLPX_HUMAN	28	1495	16881	1.61309	1	0.994637	99.7691
Annotation Cluster 5	Enrichment Score: 0.07317707725279957
Category	Term	Count	%	PValue	Genes	List Total	Pop Hits	Pop Total	Fold Enrichment	Bonferroni	Benjamini	FDR
UP_KEYWORDS	Cytoplasm	7	25	0.63114	PP1G_HUMAN, DYL1_HUMAN, SODC_HUMAN, STML2_HUMAN, BACH_HUMAN, P5CR2_HUMAN, PABP5_HUMAN	28	4816	20581	1.06837	1	0.992823	99.9984
GOTERM_CC_DIRECT	GO:0005829~cytosol	4	14.2857	0.892444	PP1G_HUMAN, DYL1_HUMAN, SODC_HUMAN, BACH_HUMAN	28	3315	18224	0.785348	1	0.999997	100
GOTERM_CC_DIRECT	GO:0005737~cytoplasm	6	21.4286	0.921636	PP1G_HUMAN, ATPF2_HUMAN, DYL1_HUMAN, SODC_HUMAN, BACH_HUMAN, CLPX_HUMAN	28	5222	18224	0.747825	1	0.999998	100
UP_KEYWORDS	Nucleus	4	14.2857	0.981806	PP1G_HUMAN, DYL1_HUMAN, SODC_HUMAN, CHCH2_HUMAN	28	5244	20581	0.560668	1	1	100
Annotation Cluster 6	Enrichment Score: 0.0019528598380821717
Category	Term	Count	%	PValue	Genes	List Total	Pop Hits	Pop Total	Fold Enrichment	Bonferroni	Benjamini	FDR
UP_KEYWORDS	Membrane	6	21.4286	0.987437	COX2_HUMAN, KCRU_HUMAN, CISY_HUMAN, ECHB_HUMAN, SFXN1_HUMAN, STML2_HUMAN	28	7494	20581	0.588499	1	1	100
UP_KEYWORDS	Transmembrane helix	3	10.7143	0.998025	COX2_HUMAN, CISY_HUMAN, SFXN1_HUMAN	28	5634	20581	0.391393	1	1	100
UP_KEYWORDS	Transmembrane	3	10.7143	0.998077	COX2_HUMAN, CISY_HUMAN, SFXN1_HUMAN	28	5651	20581	0.390215	1	1	100
GOTERM_CC_DIRECT	GO:0016021~integral component of membrane	3	10.7143	0.998559	COX2_HUMAN, CISY_HUMAN, SFXN1_HUMAN	28	5163	18224	0.378185	1	1	100
